# Supplementary material for: Highly Concentrated Alginate-Gellan Gum Composites for 3D Plotting of Complex Tissue Engineering Scaffolds
Source: MDPI journal article supplement (doi:10.3390/polym8050170), 2016-04-26
Supplement: s1 [file s1]

# Supplementary Materials: Highly Concentrated Alginate/Gellan Gum Composites for 3D Plotting of Complex Tissue Engineering Scaffolds

Ashwini Rahul Akkineni, Tilman Ahlfeld, Alexander Funk, Anja Waske, Anja Lode and Michael Gelinsky

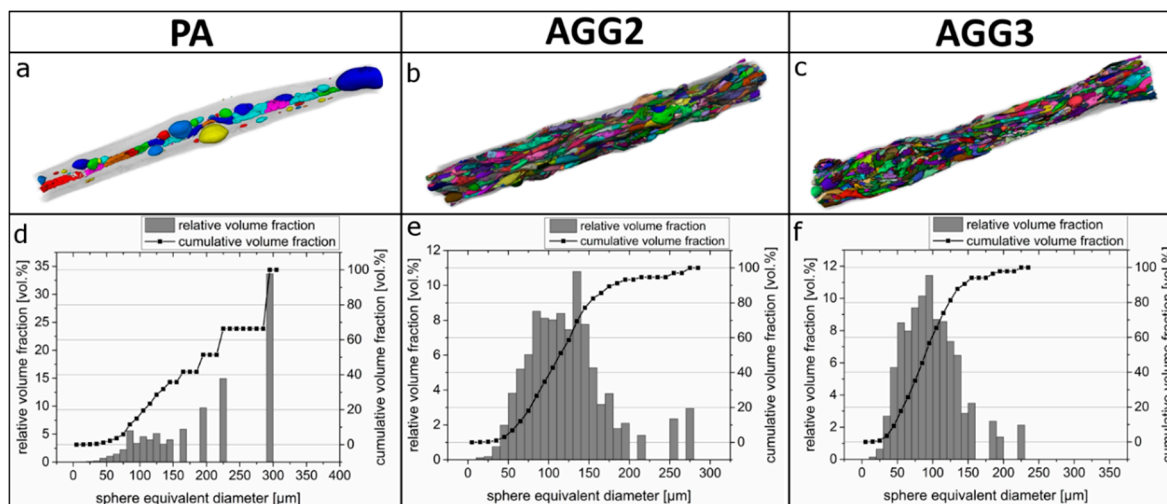

**Figure S1.** Pores in the strands visualized by reconstructed Nano-CT scans of single freeze dried strands (a) PA; (b) AGG2; (c) AGG3 (colors indicate single separated pores). The length of the strands was 4 mm. Pore size distribution of (d) PA; (e) AGG2; (f) AGG3 strands.

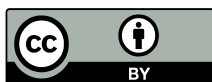

© 2016 by the authors; licensee MDPI, Basel, Switzerland. This article is an open access article distributed under the terms and conditions of the Creative Commons Attribution (CC-BY) license (<http://creativecommons.org/licenses/by/4.0/>).
